# Supplementary material for: Systematically benchmarking peptide-MHC binding predictors: From synthetic to naturally processed epitopes
Source: PLOS journal article supplement (doi:10.1371/journal.pcbi.1006457), 2018-11-08

Fig S6. **ANN layer architecture of mhcflurry\_pan.** ANN is deployed through keras and tensorflow packages. For activation function, *relu* and *sigmoid* were used for dense and output layers, correspondingly. For optimizer and loss function, adam and msd were used, respectively.

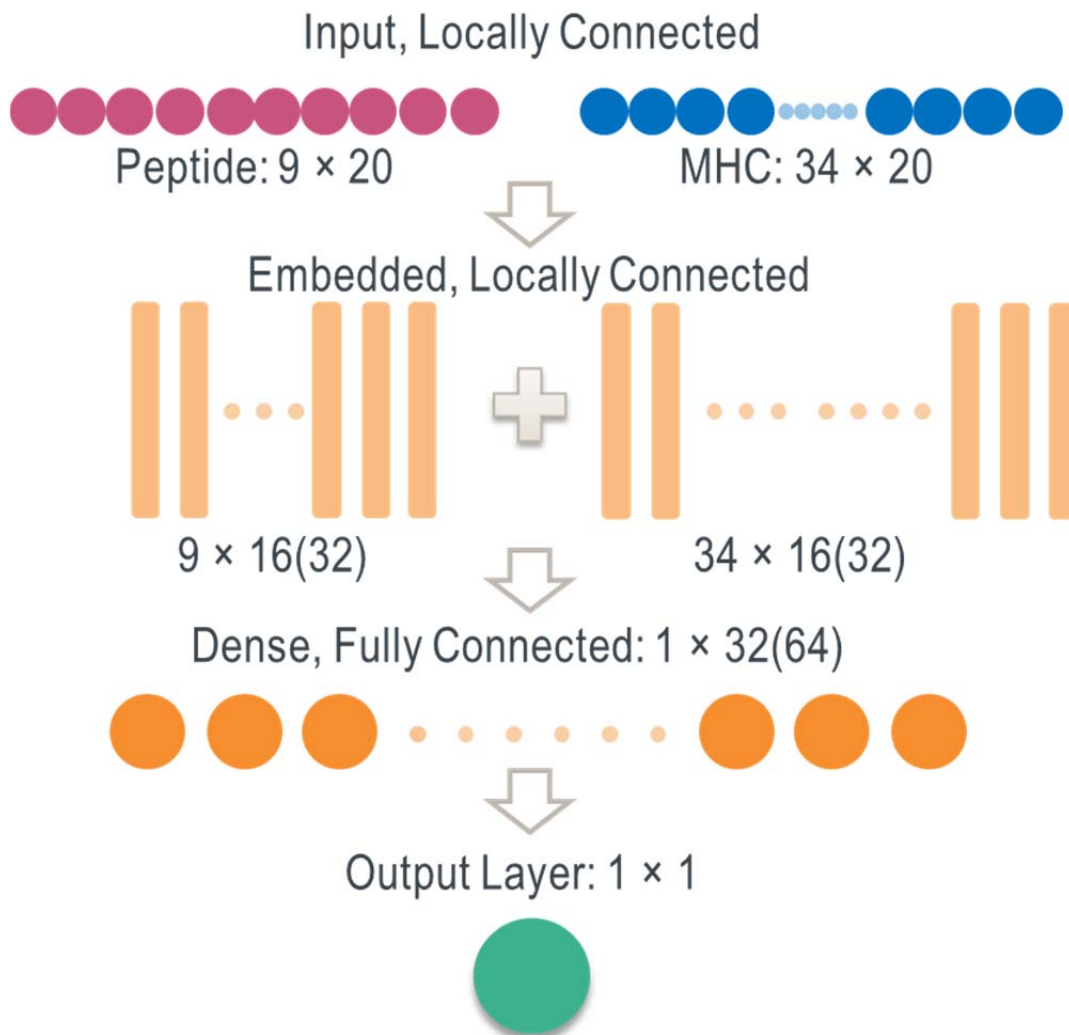

Supplement: S8 (10.1371/journal.pcbi.1006457.s008) [file journal.pcbi.1006457.s008]
